# Supplementary material for: Inhibition of USP14 promotes TNFα-induced cell death in head and neck squamous cell carcinoma (HNSCC)
Source: PubMed Central journal article supplement (PMC10154301; doi:10.1038/s41418-023-01144-x), 2023-04-13
Supplement: 41418_2023_1144_MOESM5_ESM.pdf [file 41418_2023_1144_MOESM5_ESM.pdf]

**Figure 2**

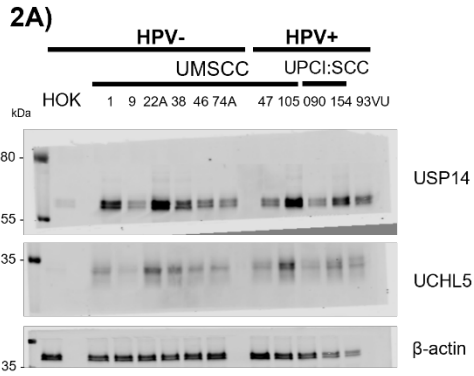

**Figure 3**

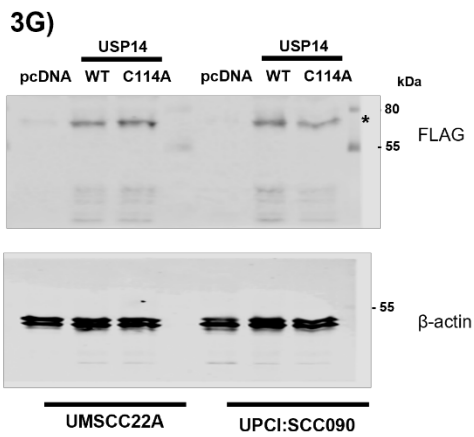

**Supplementary Figure 2**

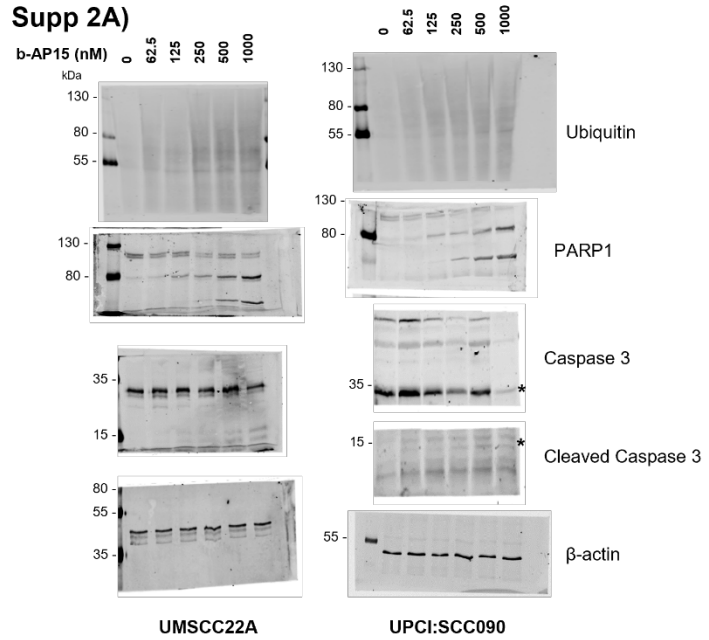

**Figure 3**

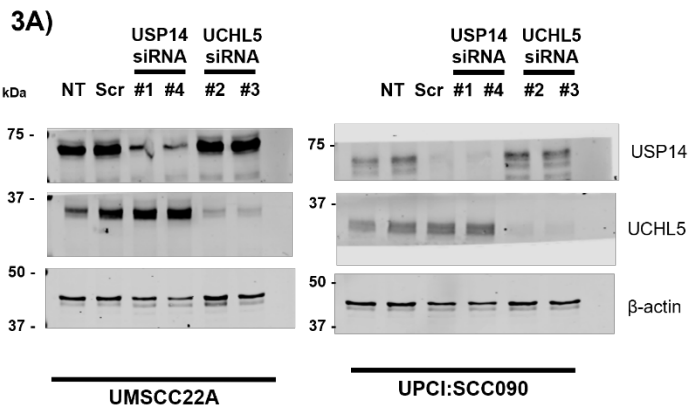

**Figure 4**

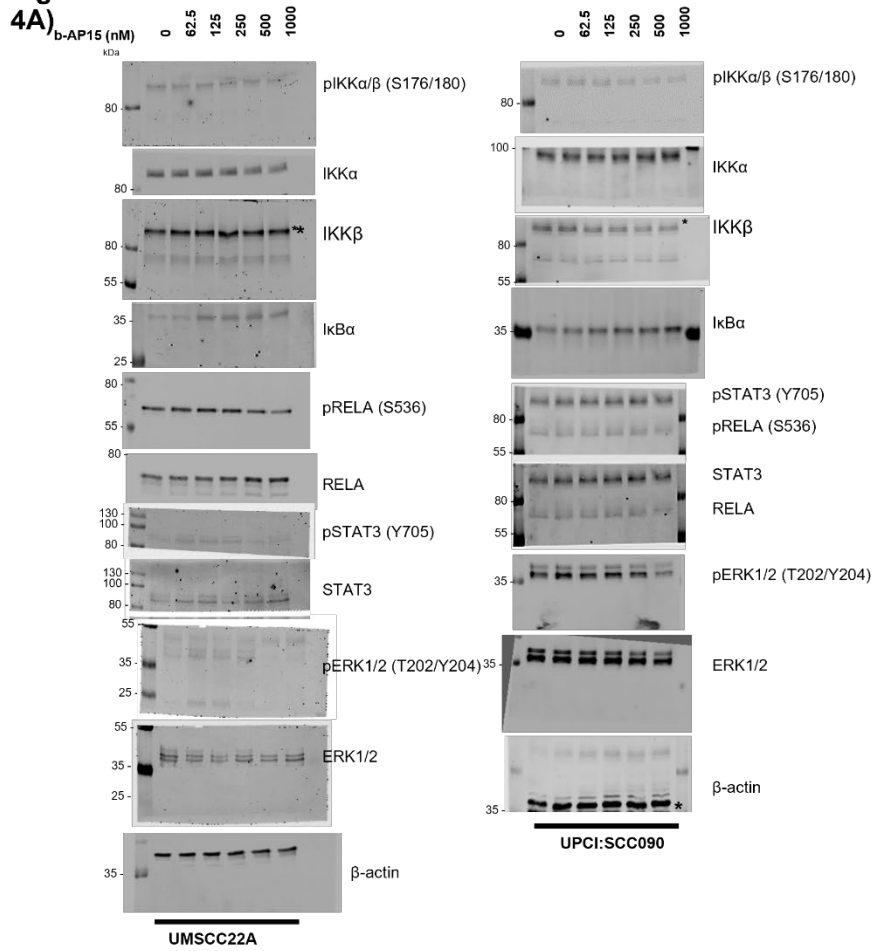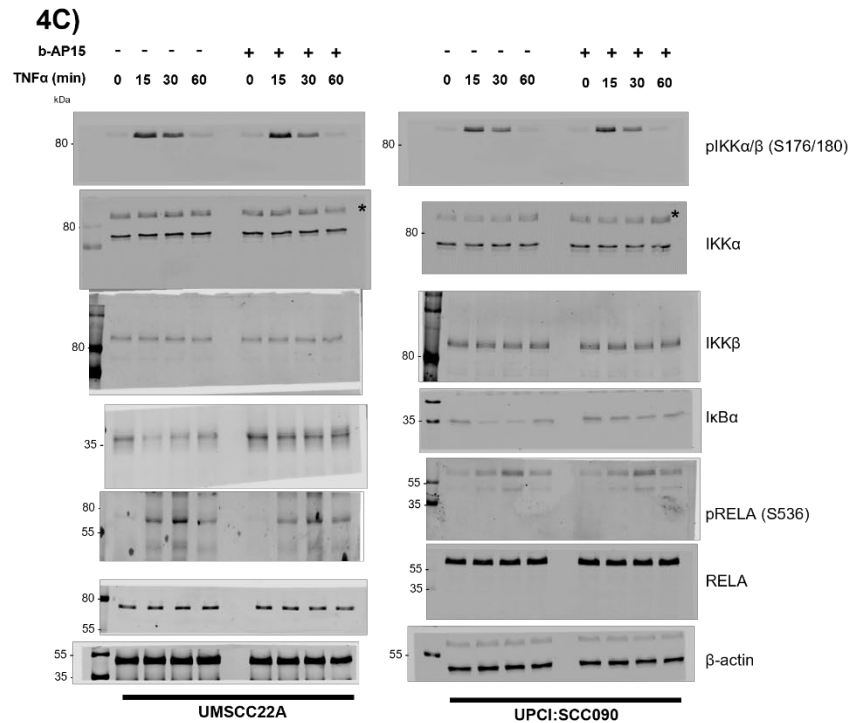

**Figure 4**  
4D)

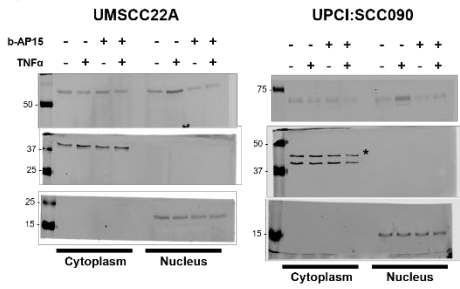

**Figure 5**  
5A)

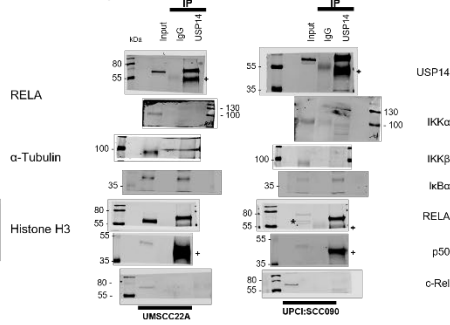

**Figure 5**  
5B)

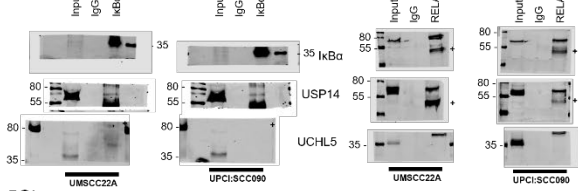

5D)

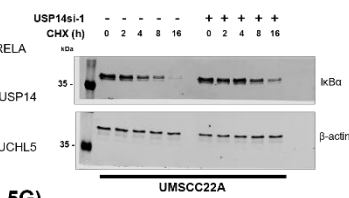

5C)

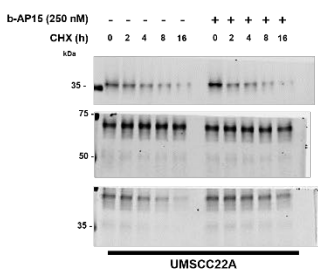

5F)

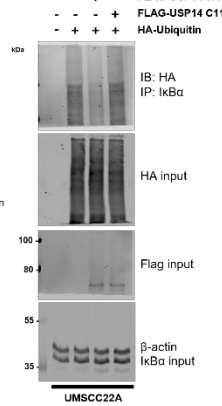

5G)

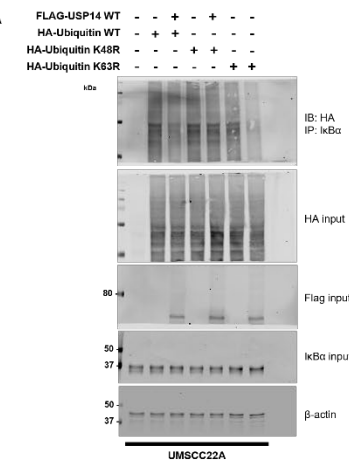

5E)

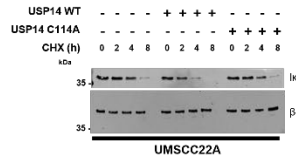

5H)

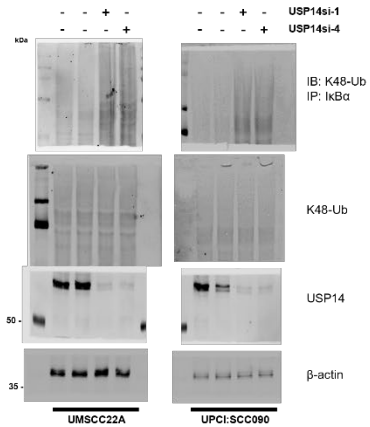

**Figure 6**  
6A)

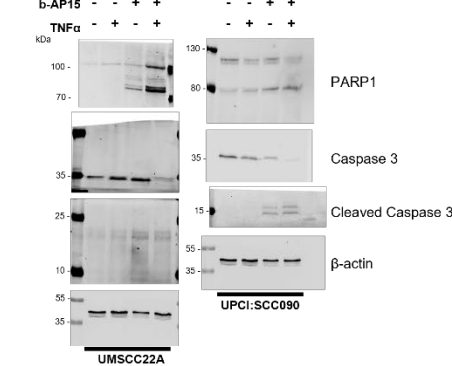

**Uncropped blots.** \* indicates the correct band where there are multiple bands. + indicated IgG bands from immunoprecipitation experiments.
