# Supplementary material for: Inhibition of USP14 promotes TNFα-induced cell death in head and neck squamous cell carcinoma (HNSCC)
Source: PubMed Central journal article supplement (PMC10154301; doi:10.1038/s41418-023-01144-x), 2023-04-13
Supplement: 41418_2023_1144_MOESM6_ESM.pdf [file 41418_2023_1144_MOESM6_ESM.pdf]

# DECLARATION OF CONTRIBUTIONS TO ARTICLE

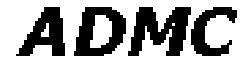

Manuscript Number:

Journal Name:

(the 'Journal')

Proposed Title of the Contribution:

(the 'Contribution')

Author(s):

(the 'Authors')

For all *CDD* articles, each person named as an author in the published version must be able to show he or she has contributed substantially to the article.

Authorship credit should be based on 1) substantial contributions to conception and design, acquisition of data, or analysis and interpretation of data; 2) drafting the article or revising it critically for important intellectual content; and 3) final approval of the version to be published. Authors should meet conditions 1, 2 and 3.

Any person who cannot be shown to have made a substantial contribution to the article cannot be listed as an author in the final version. The name of any person who is deemed to have made a minor contribution can, however, appear in the Acknowledgments section of the article.

Please complete the table below to indicate the contributions of all named authors to the manuscript.

| Author Full Name:  | Specification of Contribution to the Manuscript:                                                                                                            |
|--------------------|-------------------------------------------------------------------------------------------------------------------------------------------------------------|
| Ethan L Morgan     | Designed all experiments, performed the majority of experiments, analysed and interpreted all data, supervised the project and wrote the initial manuscript |
| Tiffany Toni       | Performed several experiments and data analysis, contributed to manuscript preparation and approved the final manuscript                                    |
| Ramya Viswanathan  | Performed several experiments and data analysis, contributed to manuscript preparation and approved the final manuscript                                    |
| Yvette Robbins     | Performed several experiments and data analysis, contributed to manuscript preparation and approved the final manuscript                                    |
| Xinping Yang       | Performed several experiments and data analysis, contributed to manuscript preparation and approved the final manuscript                                    |
| Hui Cheng          | Performed several data analyses, contributed to manuscript preparation and approved the final manuscript                                                    |
| Sreenivasulu Gunti | Created reagents for the use in the manuscript, contributed to manuscript preparation and approved the final manuscript                                     |
| Angel Huynh        | Provided reagents and technical support for the project, contributed to manuscript preparation and approved the final manuscript                            |
| Anastasia L Sowers | Provided equipment and technical support for the project, contributed to manuscript preparation and approved the final manuscript                           |
| James B Mitchell   | Provided equipment and technical support for the project, contributed to manuscript preparation and approved the final manuscript                           |
| Clint T Allen      | Assisted data analysis, provided funding, supervised the project, contributed to manuscript preparation and approved the final manuscript                   |
| Zhong Chen         | Assisted with experimental designed and analysis, supervised the project, contributed to manuscript preparation and approved the final manuscript           |
| Carter Van Waes    | Designed and analysed data, supervised the project, provided funding and wrote the initial manuscript                                                       |

Please complete the table below to indicate the contributions of all named authors to the figures.

Figure 1:

ELM, HC, ZC and CVW designed experiment. ELM and HC performed experiments and analysed data.

Figure 2:

ELM, ZC and CVW designed experiment. SG and AH provided reagents. ELM performed experiments and analysed data.

Figure 3:

ELM, ZC and CVW designed experiment. ELM performed experiments and analysed data.

Figure 4:

ELM, RV, XY, ZC and CVW designed experiment. ELM, RV and XY performed experiments and analysed data.

Figure 5:

ELM, ZC and CVW designed experiment. ELM performed experiments and analysed data.

Figure 6:

ELM, ZC and CVW designed experiment. ELM performed experiments and analysed data.

Signed for and on behalf of the Author(s):

Print Name:

Date:

Please complete the table below to indicate the contributions of all named authors to the figures.

Figure 1:

Figure 7.

ELM, TT, ALS, JBM, ZC and CVW designed experiment. ELM performed experiments and ELM, ALS and JBM analysed data.

Figure 2:

Figure 8.

ELM, TT, YR, AH, CTA, ZC and CVW designed experiment. ELM, TT, RV, YR and AH performed experiments and analysed data.

Figure 3:

Figure 4:

Figure 5:

Figure 6:

Signed for and on behalf of the Author(s):



Print Name:

ETHAN L MORGAN

Date:

08/19/2022
